# Supplementary material for: Novel heterostructured InN/TiO2 submicron fibers designed for high performance visible-light-driven photocatalysis
Source: Royal Society of Chemistry journal article supplement (doi:10.1039/c7cy01207a), 2017-01-01
Supplement: c7cy01207a1.pdf [file c7cy01207a1.pdf]

## Electronic Supporting Information

# Novel heterostructured InN/TiO<sub>2</sub> Submicron Fibers designed for high performance visible-light-driven photocatalysis

*Zhen Su, Heping Li\*, Peng Chen, Sanyuan Hu, and Youwei Yan*

State Key Laboratory of Materials Processing and Die & Mould Technology, Department of Materials Science and Engineering, Huazhong University of Science and Technology, Wuhan

430074, P. R. China. E-mail: [liheping@hust.edu.cn](mailto:liheping@hust.edu.cn)

## Experimental Results

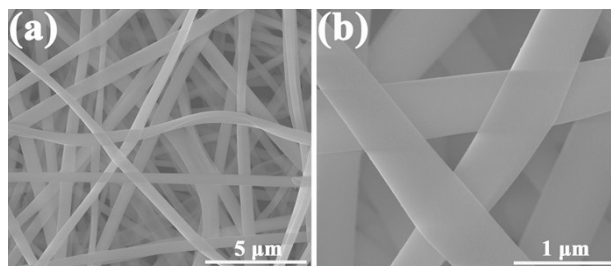

**Figure S1.** SEM images of electrospun fibers after annealing in air.

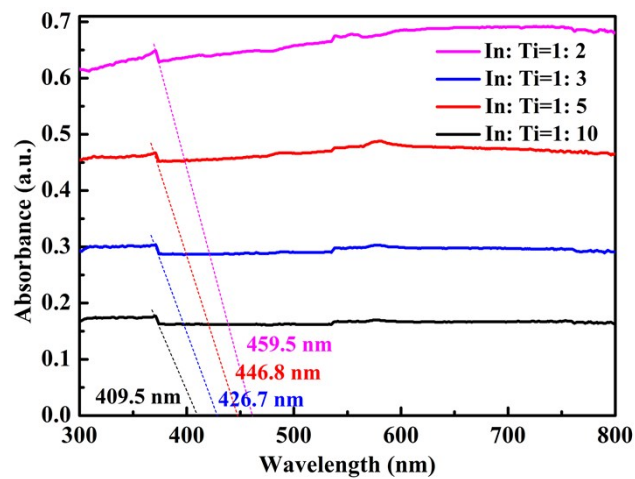

**Figure S2.** UV-vis diffuse reflectance spectra of InN/TiO<sub>2</sub> heterojunction submicron fibers with different In/Ti ratios.

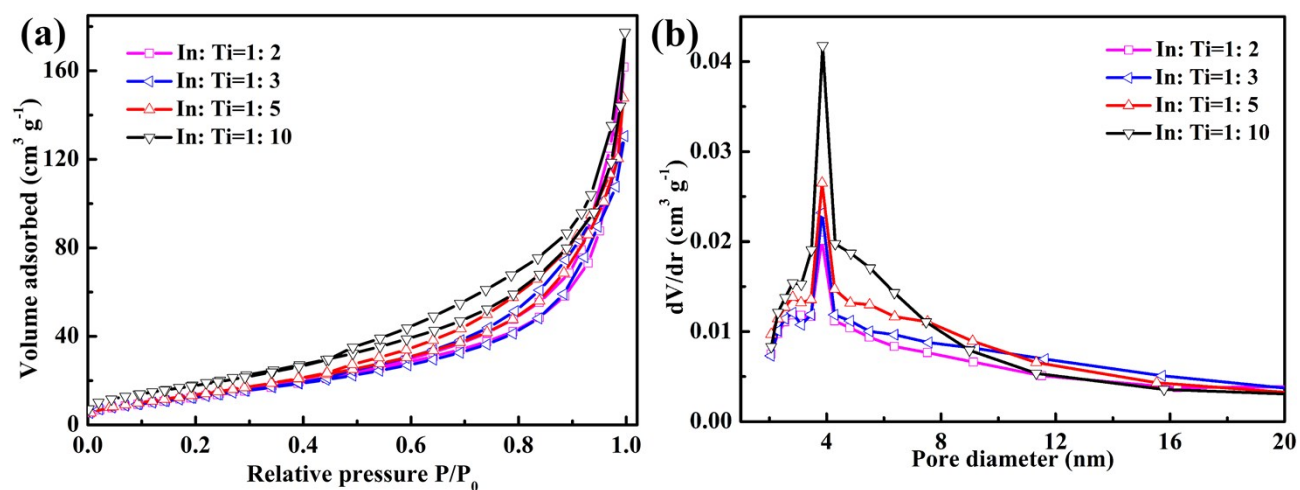

**Figure S3.** (a) Nitrogen adsorption-desorption isotherms and (b) the corresponding pore size distributions curves of InN/TiO<sub>2</sub> heterojunction submicron fibers with different In/Ti ratios.

**Table S1** BET surface area, pore volume and pore size of InN/TiO<sub>2</sub> heterojunction submicron fibers with different In/Ti ratios.

| Samples (In: Ti) | $S_{\text{BET}}$<br>(m <sup>2</sup> g <sup>-1</sup> ) | Pore volume<br>(cm <sup>3</sup> g <sup>-1</sup> ) | Average pore size<br>(nm) |
|------------------|-------------------------------------------------------|---------------------------------------------------|---------------------------|
| 1:2              | 57.22                                                 | 0.2747                                            | 12.18                     |
| 1:3              | 53.82                                                 | 0.2258                                            | 9.68                      |
| 1:5              | 60.97                                                 | 0.2587                                            | 9.78                      |
| 1:10             | 72.12                                                 | 0.3035                                            | 9.90                      |

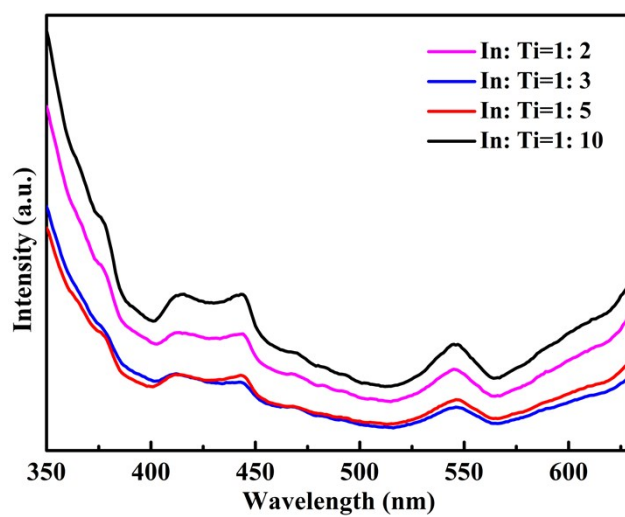

**Figure S4.** Photoluminescence (PL) spectra of InN/TiO<sub>2</sub> heterojunction submicron fibers with different In/Ti ratios with an excitation wavelength of 325 nm.

**Table S2** Comparison of rate constants obtained from TiO<sub>2</sub> based visible-light photocatalysts in the degradation of RhB

| <b>Architecture/<br/>Composition</b>                             | <b>Light source</b>                              | <b>Concentration<br/>and volume of<br/>RhB solution</b> | <b>Photocatalyst<br/>weight (mg)</b> | <b><i>k</i> (min<sup>-1</sup>)</b> | <b>Ref</b>   |
|------------------------------------------------------------------|--------------------------------------------------|---------------------------------------------------------|--------------------------------------|------------------------------------|--------------|
| TiO <sub>2</sub> nanofibers                                      | Filament lamp,<br>15 w, $\lambda > 400$ nm       | $2.5 \times 10^{-5}$<br>mol L <sup>-1</sup> ; 10 mL     | 10                                   | 0.0018                             | 21           |
| S-doped TiO <sub>2</sub><br>nanorods                             | Philipst lamps,<br>15 W, $\lambda > 400$ nm      | 10 mg L <sup>-1</sup> ,<br>20 mL                        | 10                                   | 0.0192                             | 39           |
| Zr-doped TiO <sub>2</sub><br>templated from cloth                | Tungsten halogen<br>lamp, 500 w,                 | 5 mg L <sup>-1</sup> ,<br>100 mL                        | 100                                  | 0.0044                             | 40           |
| N-doped TiO <sub>2</sub><br>nanofibers                           | Filament lamp,<br>15 w, $\lambda > 400$ nm       | $2.5 \times 10^{-5}$<br>mol L <sup>-1</sup> ; 10 mL     | 10                                   | 0.0065                             | 21           |
| Bi <sub>2</sub> MoO <sub>6</sub> /TiO <sub>2</sub><br>nanofibers | Xe lamp, 150 W,<br>$\lambda > 400$ nm            | 10 mg L <sup>-1</sup> ,<br>100 mL                       | 100                                  | 0.0084                             | 14           |
| TiO <sub>2</sub> @carbon<br>nanofibers                           | Xe lamp, 150 W,<br>$\lambda > 400$ nm            | 5 mg L <sup>-1</sup> ,<br>100 mL                        | 30                                   | 0.0053                             | 16           |
| Copper(II)<br>phthalocyanine/<br>TiO <sub>2</sub> nanofibers     | Xe lamp, 150 W,<br>$\lambda > 400$ nm            | 10 mg L <sup>-1</sup> ,<br>100 mL                       | 100                                  | 0.0079                             | 17           |
| TiO <sub>2</sub> /CdS<br>nanofibers                              | Xe lamp, 150 W,<br>$\lambda > 400$ nm            | 10 mg L <sup>-1</sup> ,<br>100 mL                       | 100                                  | 0.0114                             | 15           |
| In <sub>2</sub> O <sub>3</sub> /TiO <sub>2</sub><br>nanofibers   | Xe lamp, 150 W,<br>$\lambda > 420$ nm            | 10 mg L <sup>-1</sup> ,<br>100 mL                       | 50                                   | 0.009                              | 18           |
| Fe-doped SnO <sub>2</sub> /TiO <sub>2</sub><br>nanofibers        | Filament lamp,<br>15 w, $\lambda > 400$ nm       | $2.5 \times 10^{-5}$<br>mol L <sup>-1</sup> ; 10 mL     | 10                                   | 0.0018                             | 41           |
| InN/TiO <sub>2</sub><br>submicron fibers                         | Table lamp, 14 w,<br>420 nm $< \lambda < 750$ nm | $2.5 \times 10^{-5}$<br>mol L <sup>-1</sup> ; 10 mL     | 10                                   | 0.089                              | This<br>work |

**Table S3** Comparison of rate constants between InN/TiO<sub>2</sub> heterojunction submicron fibers and new-type visible-light photocatalysts in the degradation of RhB

| <b>Architecture/<br/>Composition</b>                                                | <b>Light source</b>                              | <b>Concentration<br/>and volume of<br/>RhB solution</b> | <b>Photocatalyst<br/>weight (mg)</b> | <b><i>k</i> (min<sup>-1</sup>)</b> | <b>Ref</b>   |
|-------------------------------------------------------------------------------------|--------------------------------------------------|---------------------------------------------------------|--------------------------------------|------------------------------------|--------------|
| WO <sub>3</sub> nanobars                                                            | Xe lamp, 450 W,<br>$\lambda > 420$ nm            | 10 <sup>-5</sup> mol L <sup>-1</sup> ;<br>50 mL         | 50                                   | 0.0054                             | 42           |
| BiVO <sub>4</sub><br>nanostructures                                                 | Xe lamp, 350 W,                                  | 2.0 × 10 <sup>-5</sup> mol<br>L <sup>-1</sup> ; 200 mL  | 200                                  | 0.001                              | 43           |
| In <sub>2</sub> O <sub>3</sub> nanocubes/<br>carbon nanofibers                      | Xe lamp, 150 W,<br>$\lambda > 420$ nm            | 10 mg L <sup>-1</sup> ,<br>100 mL                       | 100                                  | 0.0036                             | 44           |
| Bi <sub>2</sub> S <sub>3</sub> /CdS<br>heterostructure                              | Xe lamp, 150 W,<br>$\lambda > 420$ nm            | 10 mg L <sup>-1</sup> ,<br>50 mL                        | 100                                  | 0.0144                             | 45           |
| Graphene-Bi <sub>2</sub> O <sub>2</sub> CO <sub>3</sub><br>composites               | Xe lamp, 350 W,<br>$\lambda > 400$ nm            | 10 <sup>-5</sup> mol L <sup>-1</sup> ,<br>20 mL         | 100                                  | 0.032                              | 46           |
| BiVO <sub>4</sub> /Bi <sub>2</sub> O <sub>2</sub> CO <sub>3</sub><br>nanocomposites | Xe lamp, 350 W,<br>$\lambda > 420$ nm            | 2 × 10 <sup>-5</sup><br>mol L <sup>-1</sup> , 20 mL     | 100                                  | 0.053                              | 47           |
| CdPc/PAN<br>nanofibers                                                              | Xe lamp, 150 W,<br>$\lambda > 400$ nm            | 10 mg L <sup>-1</sup> ,<br>100 mL                       | 100                                  | 0.0044                             | 48           |
| Bi <sub>2</sub> MoO <sub>6</sub> -carbon<br>nanofiber<br>heterostructure            | Xe lamp, 150 W,<br>$\lambda > 420$ nm            | 10 mg L <sup>-1</sup> ,<br>100 mL                       | 50                                   | 0.0070                             | 49           |
| InN/TiO <sub>2</sub><br>submicron fibers                                            | Table lamp, 14 w,<br>420 nm < $\lambda$ < 750 nm | 2.5 × 10 <sup>-5</sup><br>mol L <sup>-1</sup> ; 10 mL   | 10                                   | 0.089                              | This<br>work |
